# Supplementary material
Source: PubMed Central journal article supplement (PMC5816153)
Supplement: pnas.201712452SI.pdf [file pnas.201712452SI.pdf]

# Supporting Information

Betts et al. 10.1073/pnas.1712452115

## SI Materials and Methods

**mAbs and Flow Cytometry.** Fluorochrome-conjugated anti-mouse or -human monoclonal antibodies included anti-CD3, CD4, CD8, CD25, CD127, Foxp3, B220, H2K<sup>b</sup>, CD45.1, T-bet, IFN $\gamma$ , IL-4, IL-5, IL-10, IL-17,  $\alpha_4\beta_7$ , CXCR3, CCR6, streptavidin, phosphorylated STAT1, phosphorylated STAT3 Y705, and phosphorylated STAT5 Y694 (BD Biosciences; eBioscience; Cell Signaling Technology). As indicated, CFSE was used in standard proliferation assays. Live/Dead Fixable Yellow Dead Cell Stain (Life Technologies) was used to determine viability. Live events were acquired on a FACSCanto or LSRII flow cytometer (FlowJo software, version 7.6.4; TreeStar).

### Human T Cell and NK-Cell in Vitro Experiments.

**Allogeneic Mixed Leukocyte Reaction.** Human, DC-allostimulated T cell proliferation was tested in standard, 5-d mixed leukocyte reactions (MLRs) (DC:T cell ratio 1:30). DMSO or pacritinib (2.5  $\mu$ M) was added once on day 0. T cell proliferation was determined by a colorimetric assay according to the manufacturer's instructions (CellTiter96 Aqueous One Solution Cell Proliferation Assay MTS; Promega) (18). As indicated, intracellular T-bet, IFN $\gamma$ , and/or IL-4 was quantified by flow cytometry on day +5 following a 4- to 5-h stimulation with phorbol 12-myristate 13-acetate/ionomycin.

**NK-cell proliferation.** Magnetic bead purified NK cells were cultured with allogeneic, immature dendritic cells or a cytokine mixture of IL-2 (200 IU/mL) and IL-15 (10 ng/mL). Medium was supplemented with additional cytokines on days +2 and +4. Pacritinib (2.5  $\mu$ M), ruxolitinib (1  $\mu$ M), or DMSO vehicle control was added once on day 0. NK-cell proliferation was measured by a colorimetric assay on day +5.

**NK-cell tumor lysis.** Human NK cells were cultured with HLA class I-deficient K562 targets at the described ratios. Pacritinib (2.5  $\mu$ M), ruxolitinib (1  $\mu$ M), or DMSO vehicle control was added to the cultures. NK-cell lytic function was measured after 4 h.

**Protein Phosphorylation Experiments.** For STAT1, STAT3, and STAT5 phosphorylation, human T cells were serum-starved in RPMI treated with DMSO, pacritinib (2.5  $\mu$ M), or ruxolitinib (1  $\mu$ M) as indicated (17) for 4 h. IL-6-induced pSTAT3, IL-2-induced pSTAT5 (Y694), or IFN $\gamma$ -induced pSTAT1 was measured by flow cytometry as described (18).

**iTreg Experiments.** Human iTregs were generated as previously described (18) in the presence of DMSO or pacritinib (2.5  $\mu$ M). On day +5, iTregs were isolated and washed to minimize drug carryover as reported (18). The T cells were harvested and surface-stained for CD3, CD4, CD25, and CD127, followed by fixation and permeabilization (eBioscience) and then Foxp3 staining. The iTregs were identified as CD4<sup>+</sup>, CD127<sup>-</sup>, CD25<sup>+</sup>, and Foxp3<sup>+</sup> (18). Activated CD4<sup>+</sup> and Tconv cells were phenotypically characterized by expression of CD25 and CD127 (18). To test suppressive potency, the purified iTregs were titrated against allo-MLRs consisting of  $5 \times 10^4$  responder CD4<sup>+</sup>CD25<sup>-</sup> T cells from the iTreg donor and  $1.6 \times 10^3$  DCs from the original stimulator donor. T cell proliferation was determined by pulsing cells with 1 uCi/well 3H-thymidine during the last 18 h of culture (18). The iTreg suppression cultures were not treated with DMSO or pacritinib.

**ROR $\gamma$ T RT-PCR.** Th17 differentiation was assessed among CD4<sup>+</sup> T cells by RT-PCR. Naive CD4<sup>+</sup> T cells were purified by magnetic bead separation (Miltenyi Biotec) and stimulated with allogeneic DCs (DC:T cell ratio 1:30). The cocultures were treated with pacritinib (2.5  $\mu$ M) or DMSO. The media were supplemented with IL-6, TGF $\beta$ , and anti-IFN $\gamma$  as described (5). After 5 d, the cells were harvested and total RNA was extracted. Assay primer selection and RT-PCR procedure were carried out as described (5).

**B- and T Cell Coculture Cytokines.** Healthy donor B and T cells were stimulated with goat anti-human IgM and superantigens in the presence of pacritinib or vehicle control (BioSeek). Cytokines were measured after 72 h of incubation and analyzed as described (26).

**In Vivo Human CTL Generation.** To generate CD8<sup>+</sup> CTL in vivo, mice were transplanted with  $30 \times 10^6$  human PBMCs and also received an inoculum of irradiated U937 cells ( $10 \times 10^6$ ) on day 0 and +7 as described (18). A control cohort of mice received PBMCs alone and were not vaccinated with tumor. Mice did not receive skin grafts for these experiments. Mice were treated with pacritinib (100 mg/kg), ruxolitinib (30 mg/kg) (4), or vehicle twice a day starting on day 0. On days +10–12, the mice were humanely euthanized, and the spleens were harvested. Human CD8<sup>+</sup> T cells were isolated from single-cell spleen suspension using magnetic bead isolation. Tumor lysis assays were performed in vitro (18).
